# Supplementary material for: Brd4 Activates Early Viral Transcription upon Human Papillomavirus 18 Infection of Primary Keratinocytes
Source: PubMed Central journal article supplement (PMC5120138; doi:10.1128/mbio.01644-16), 2016-11-22
Supplement: mbo006163082sf1.pdf [file mbo006163082sf1.pdf]

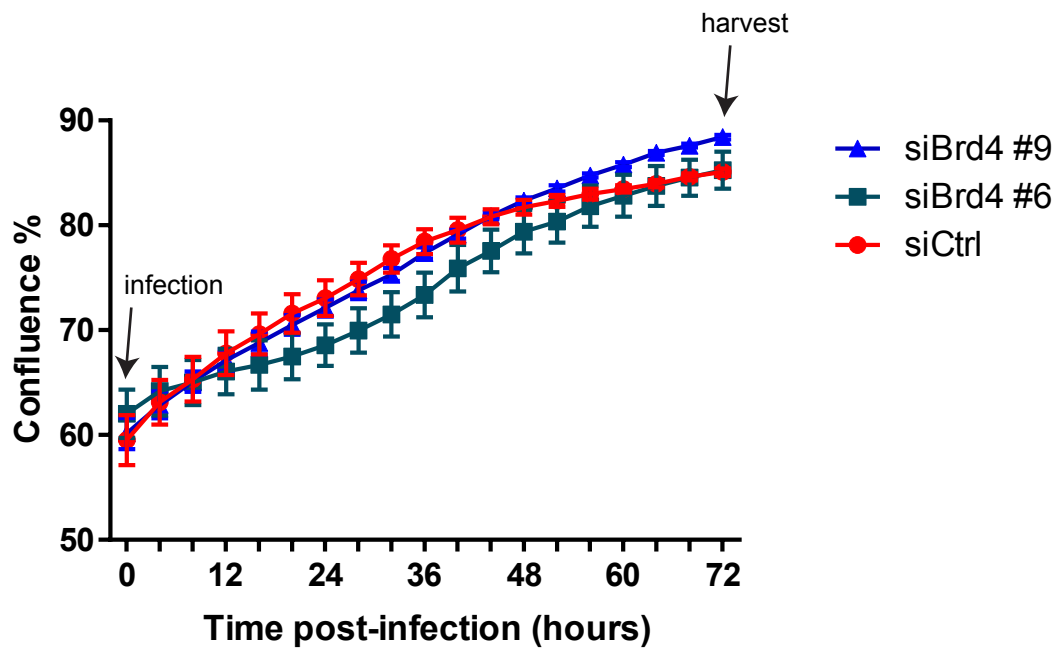

### Supplementary Figure 1 Effect of Brd4 downregulation on cell growth

HFKs were transfected with 20nM Brd4-targeting or All\* negative control siRNA. Twenty-four hours post-transfection, cells were infected with 100VGE/cell HPV18 quasivirus. Cell growth was monitored in an Incucyte microscope to assess toxicity of the Brd4 downregulation. Proliferation was measured (% confluence) in an Incucyte microscope for up to 72 hours (note that keratinocytes are cultured on a background of irradiated feeders). The data shown is compiled from four technical replicates (individual wells) and is a representative experiment from two independent experiments. Error bars=SEM
